# Supplementary material
Source: PubMed Central journal article supplement (PMC3176439)

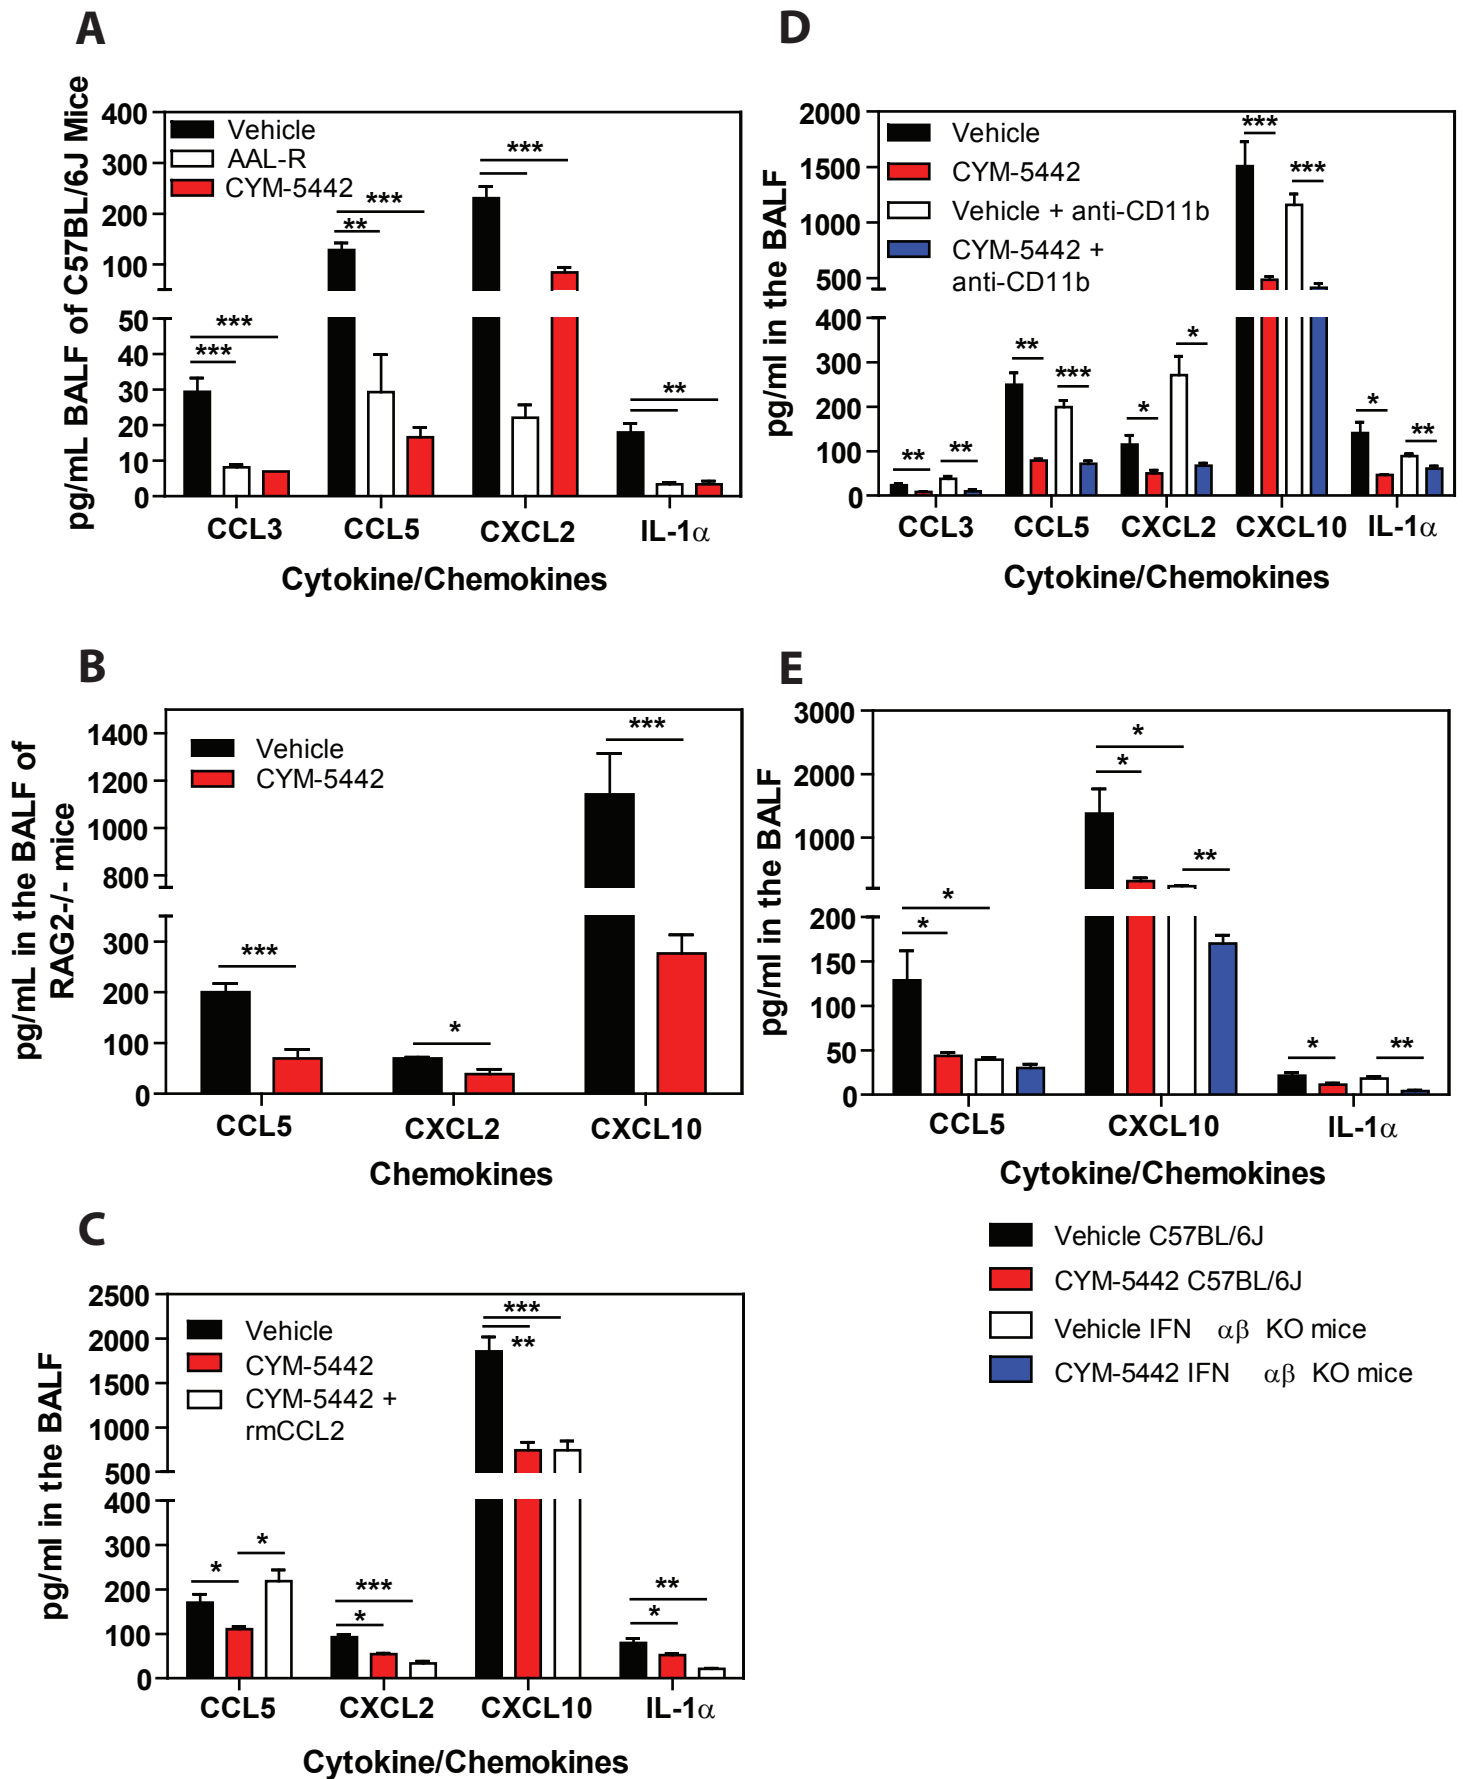

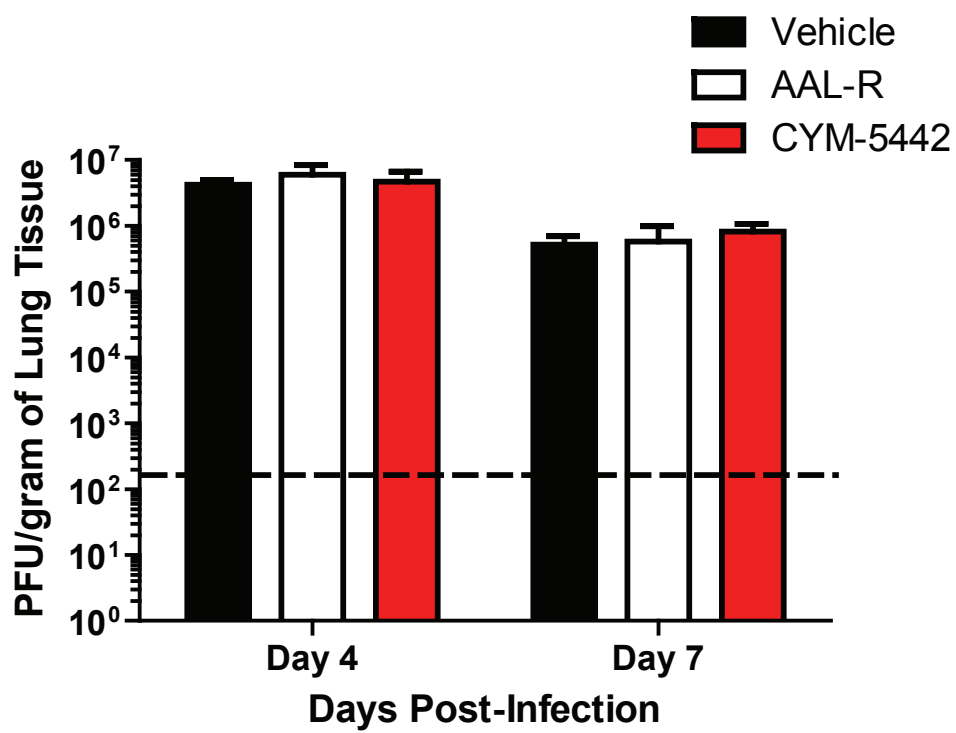

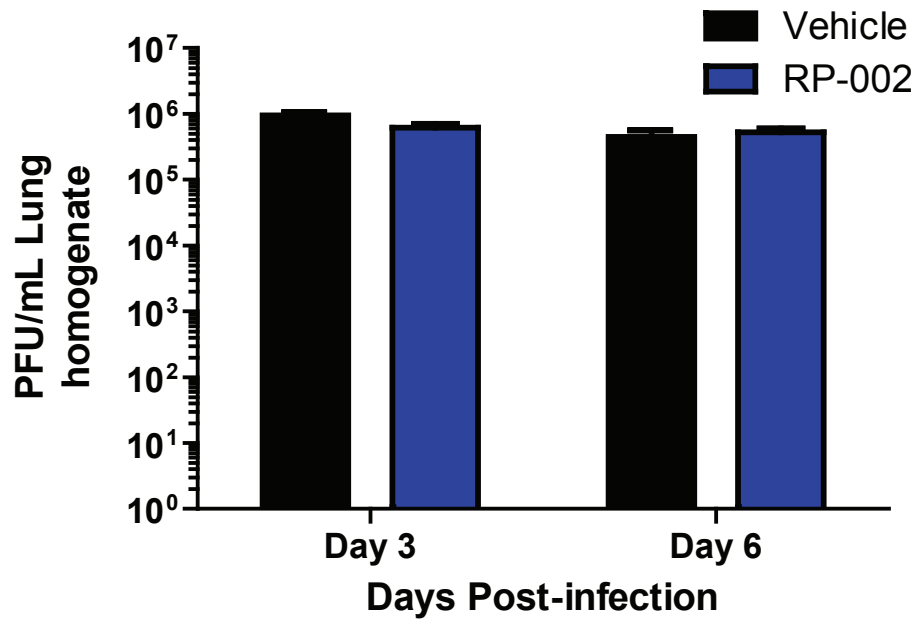

**A**

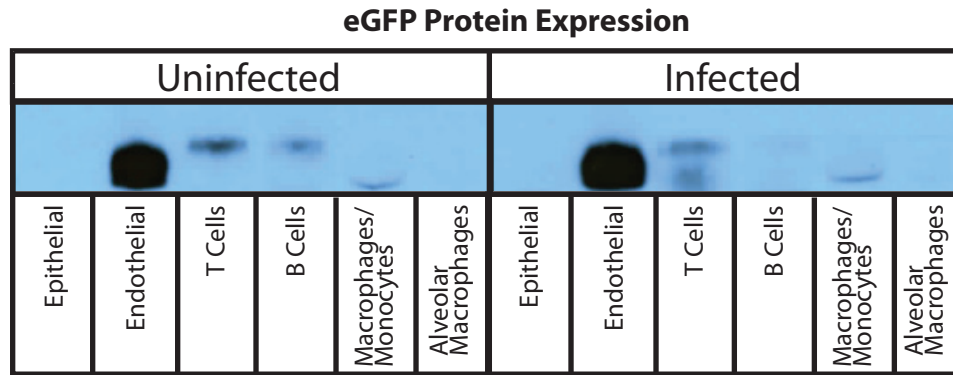

**B**

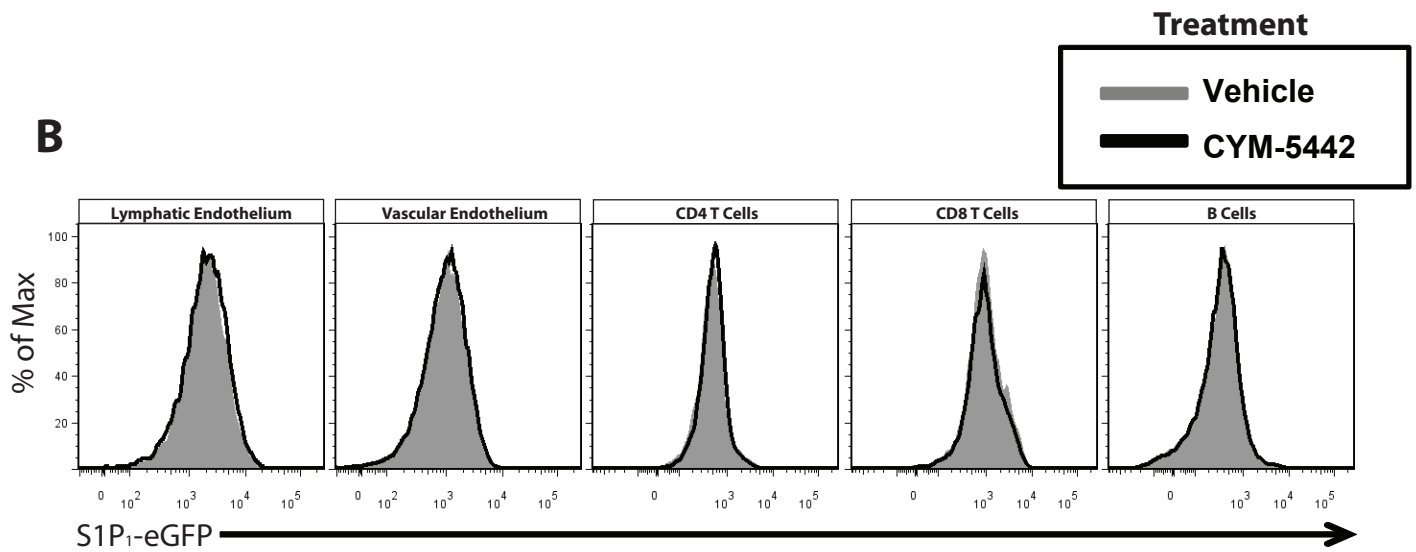

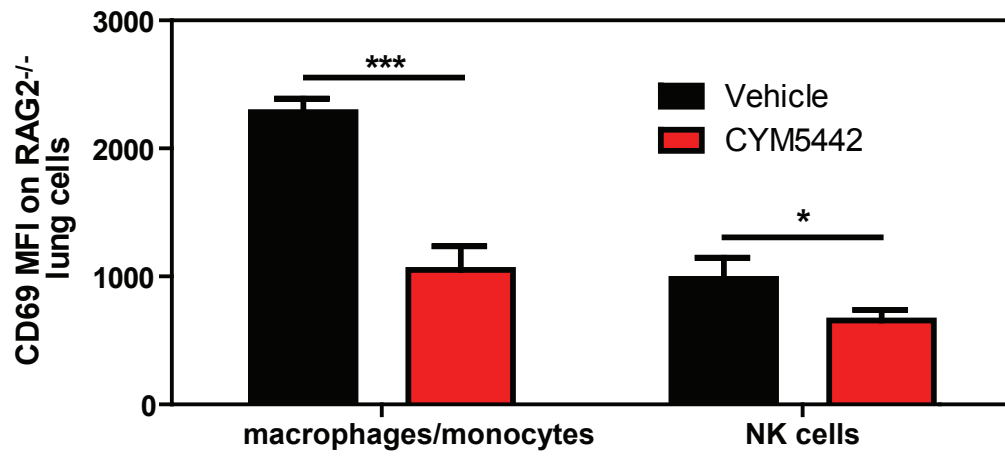

**Integrin Expression on pulmonary endothelial cells**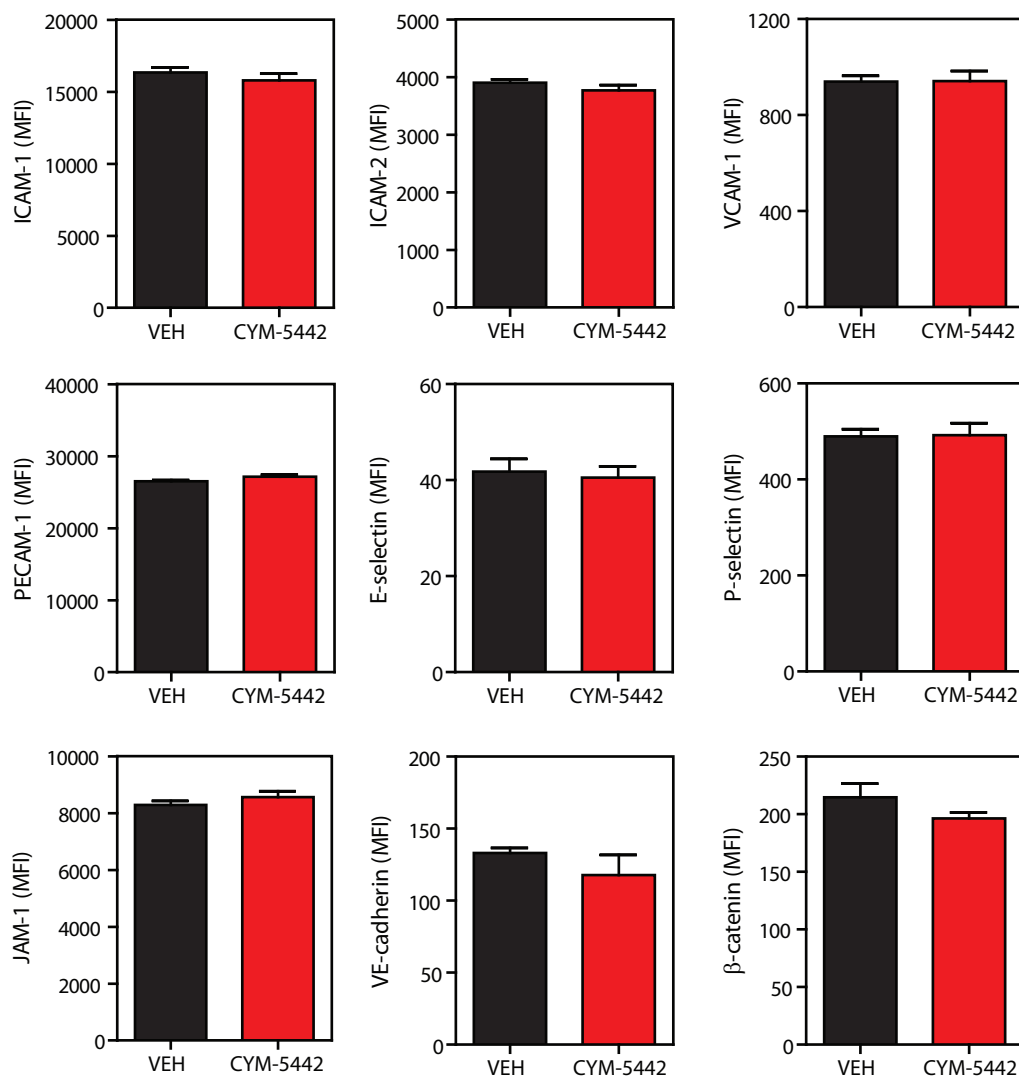

A

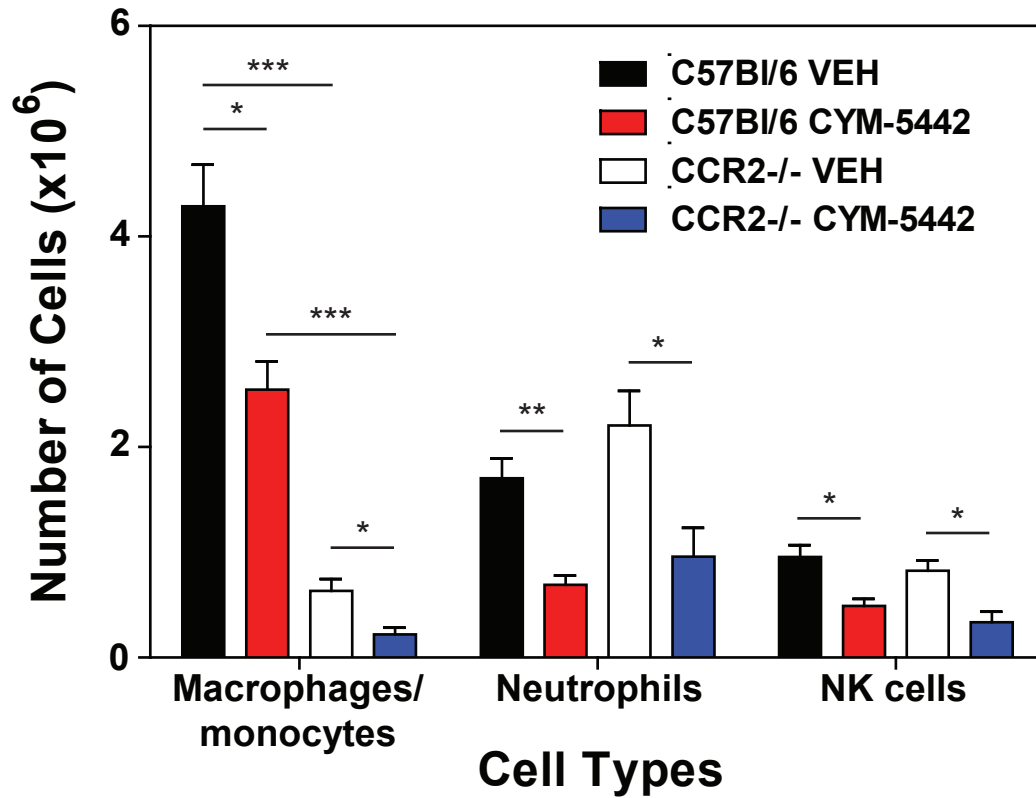

B

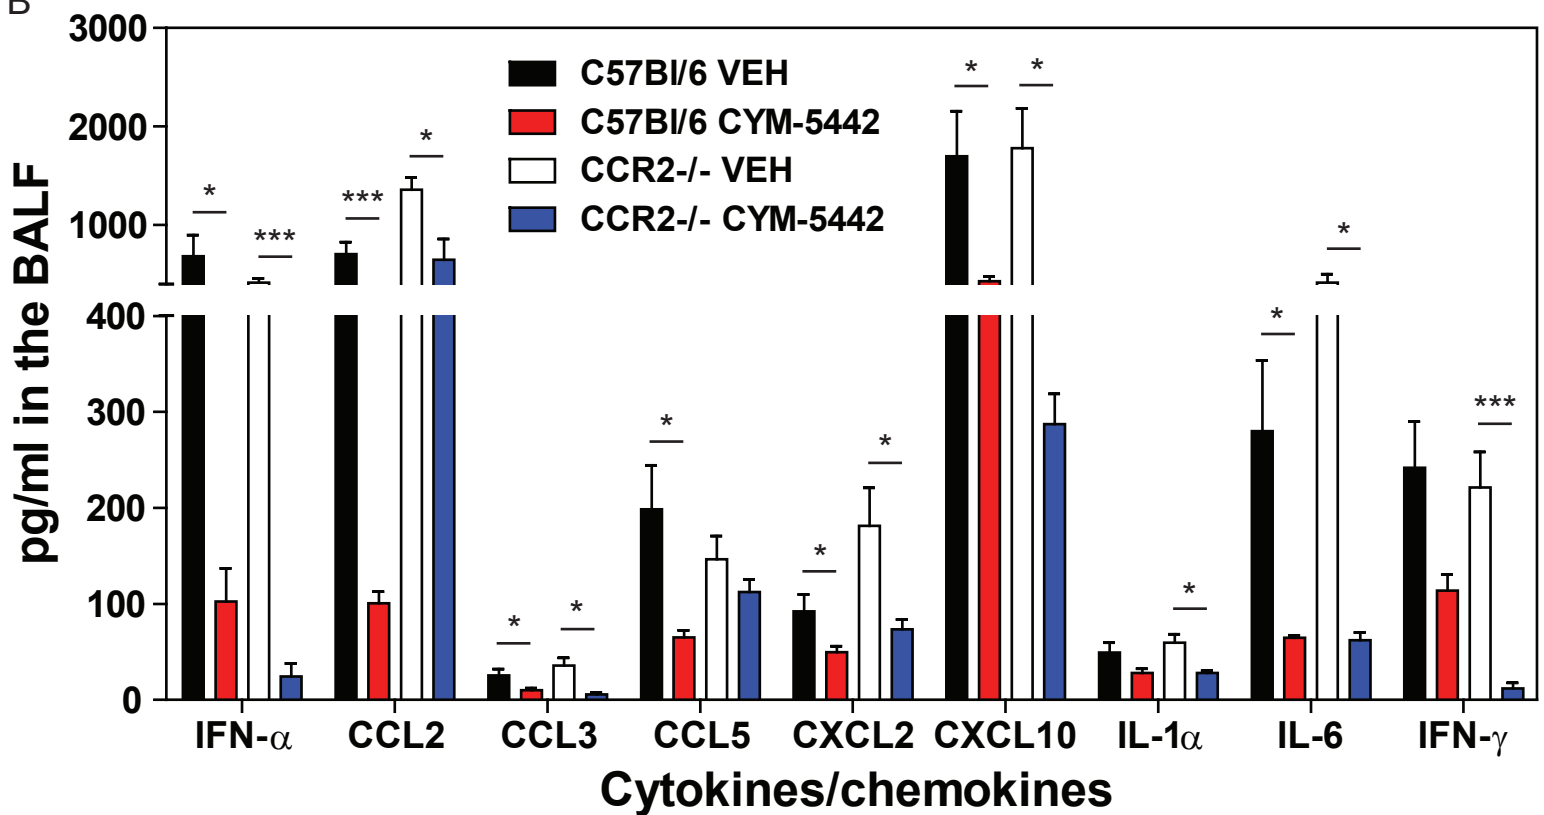

Supplement: NIHMS320074-supplement-02.pdf [file NIHMS320074-supplement-02.pdf]
